# Supplementary material for: The Escherichia coli BtuE Protein Functions as a Resistance Determinant against Reactive Oxygen Species
Source: PLoS One. 2011 Jan 10;6(1):e15979. doi: 10.1371/journal.pone.0015979 (PMC3018469; doi:10.1371/journal.pone.0015979)
Supplement: Table S2 — BtuE mediates resistance to potassium tellurite and other ROS elicitors in E. coli . (DOCX) [file pone.0015979.s004.docx]

**Table S2.** BtuE mediates resistance to potassium tellurite and other ROS elicitors in *E. coli*.

**Toxicant**

| **Strain** | **K2TeO3** | **H2O2** | **K2CrO4** | **CdCl2** |
| --- | --- | --- | --- | --- |
| **BW25113 pBAD** | 4 | 3,300 | 700 | 1,600 |
| **BW25113 pBAD/*btuE*** | 17 | 30,000 | 2,600 | 1,600 |
| **∆*btuE* pBAD** | 2 | 3,700 | 900 | 1,200 |
| **∆*btuE* pBAD/*btuE*** | 6 | 19,300 | 2,300 | 1,200 |

Minimal inhibitory concentrations (μM) of K2TeO3, K2CrO4, H2O2 and CdCl2 were determined initially using serial dilutions as described in Methods. Values (the mean of three independent determinations) were further delimited using sterile solutions of appropriate concentrations of these compounds.
